# Supplementary material for: A small molecule NRF2 activator BC-1901S ameliorates inflammation through DCAF1/NRF2 axis
Source: PubMed Central journal article supplement (PMC7068124; doi:10.1016/j.redox.2020.101485), 2020-03-04

Figure S1

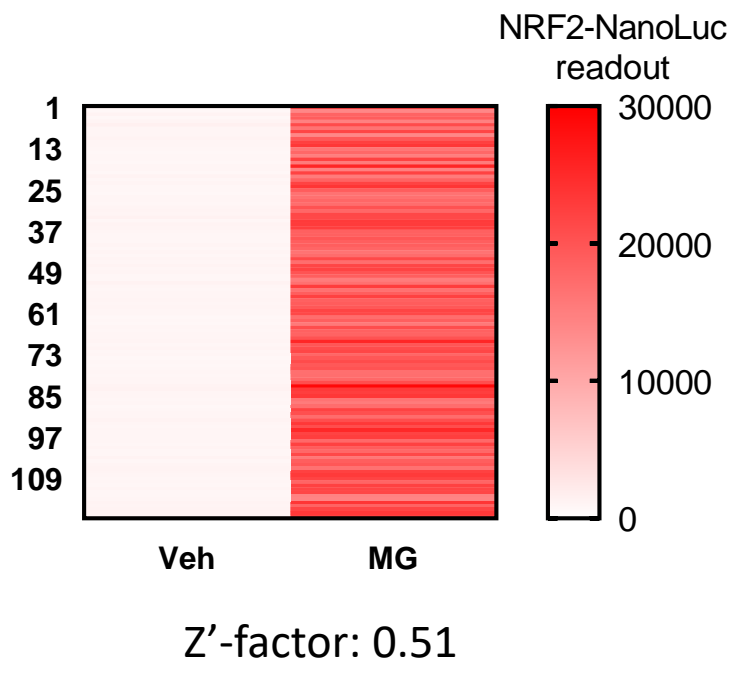

Figure S2

A

G856-6116

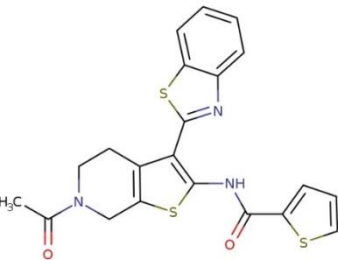

B

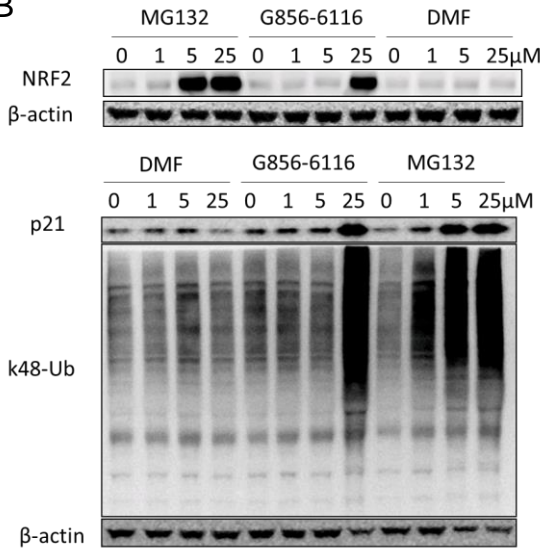

C

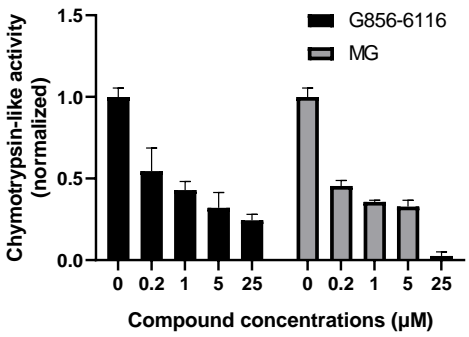

Figure S3

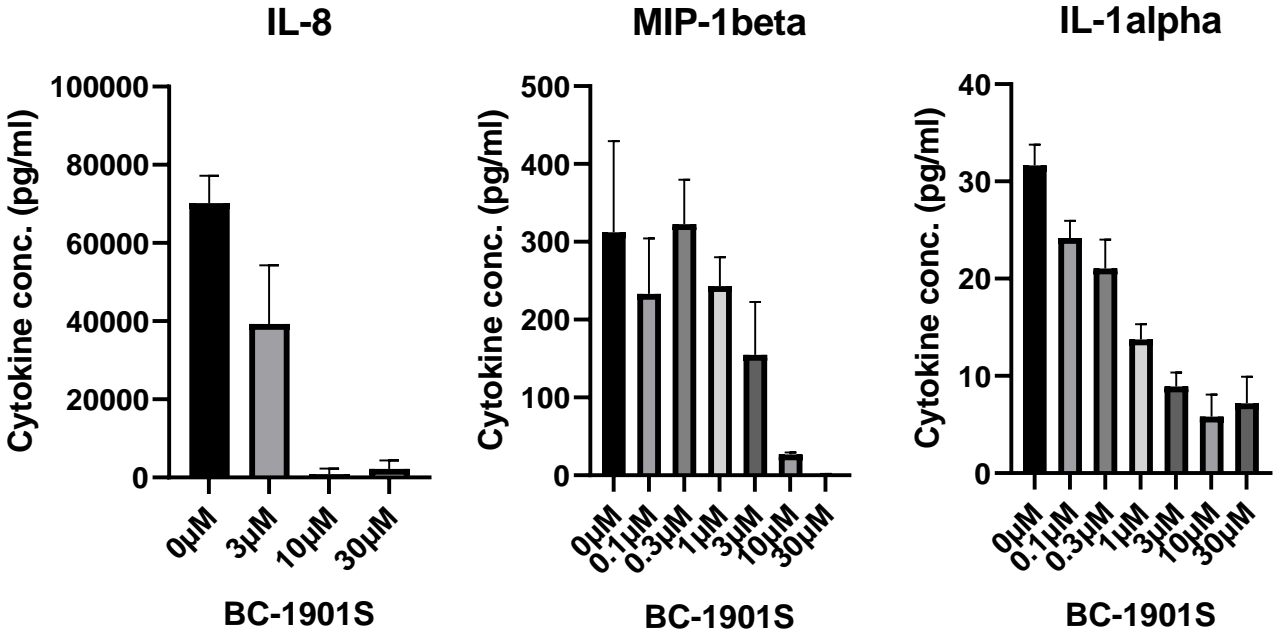

Figure S4

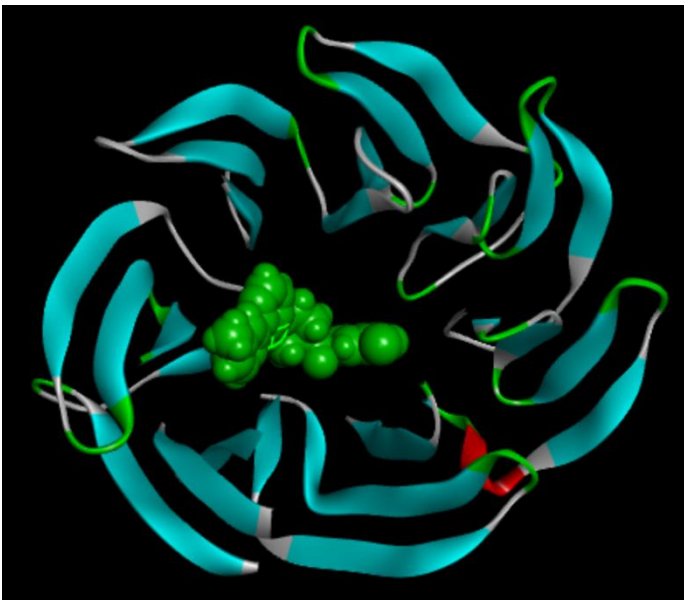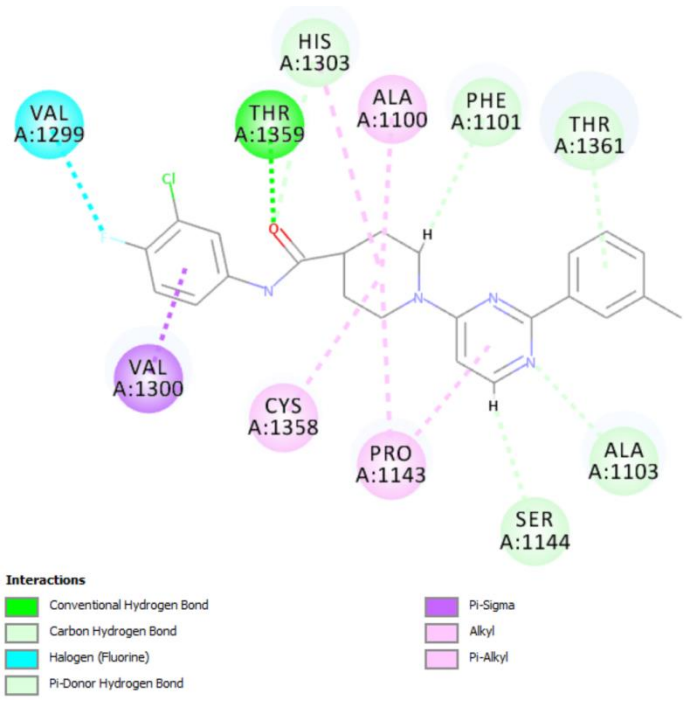

Supplement: mmc1.pdf [file mmc1.pdf]
