# Supplementary material for: A small molecule NRF2 activator BC-1901S ameliorates inflammation through DCAF1/NRF2 axis
Source: PubMed Central journal article supplement (PMC7068124; doi:10.1016/j.redox.2020.101485), 2020-03-04
Supplement: mmc2.pdf [file mmc2.pdf]

# TABLE S1

|       | T622-0510 | T622-0158 | 3568-0108 | Y020-1093 | T622-0548 | T815-1119 | T965-0869 | T479-0307 | T633-2591 | D398-0620 | E470-0488 | E538-0203 | D715-0442 | D715-0530 | E859-0056 | E786-0108 | F869-0035 | G216-0296 | G856-6116 | J005-0540 | M475-0143 | 1418-0044 | T993-0873 | 5988-0062 |
|-------|-----------|-----------|-----------|-----------|-----------|-----------|-----------|-----------|-----------|-----------|-----------|-----------|-----------|-----------|-----------|-----------|-----------|-----------|-----------|-----------|-----------|-----------|-----------|-----------|
| 0     | 0.977     | 0.929     | 0.896     | 0.900     | 1.106     | 1.161     | 3.932     | 1.112     | 0.843     | 0.947     | 0.885     | 0.835     | 1.172     | 0.953     | 1.140     | 0.946     | 1.057     | 1.017     | 0.925     | 0.945     | 1.050     | 0.952     | 1.168     | 1.084     |
| 0.001 | 0.951     | 0.946     | 0.915     | 1.102     | 0.913     | 1.245     | 1.107     | 0.923     | 0.820     | 0.950     | 0.912     | 0.915     | 0.946     | 1.072     | 0.998     | 1.018     | 1.084     | 0.943     | 1.022     | 1.036     | 0.965     | 1.025     | 1.157     | 1.145     |
| 0.008 | 0.968     | 0.821     | 1.000     | 0.854     | 0.964     | 0.915     | 0.885     | 0.898     | 0.925     | 0.868     | 0.907     | 1.008     | 1.015     | 0.991     | 0.929     | 0.942     | 0.801     | 0.935     | 0.775     | 0.827     | 0.906     | 0.911     | 1.058     | 0.942     |
| 0.04  | 1.067     | 0.832     | 0.995     | 1.019     | 1.132     | 0.966     | 0.917     | 0.880     | 0.915     | 0.821     | 0.810     | 0.920     | 1.214     | 0.915     | 0.855     | 0.939     | 0.792     | 0.923     | 1.166     | 0.890     | 0.895     | 0.825     | 1.051     | 1.004     |
| 0.2   | 1.046     | 0.877     | 0.838     | 0.957     | 0.932     | 0.850     | 0.806     | 0.858     | 0.953     | 0.866     | 0.930     | 1.050     | 1.033     | 0.981     | 0.907     | 0.858     | 0.917     | 0.784     | 0.945     | 1.029     | 0.809     | 1.178     | 0.943     | 0.931     |
| 1     | 1.050     | 1.069     | 0.939     | 0.903     | 0.879     | 1.032     | 1.003     | 0.902     | 0.921     | 1.017     | 0.917     | 0.949     | 1.283     | 0.952     | 0.915     | 1.015     | 0.916     | 0.903     | 1.009     | 0.905     | 0.841     | 0.841     | 0.943     | 0.957     |
| 5     | 1.209     | 1.005     | 0.953     | 0.832     | 1.051     | 0.917     | 1.026     | 0.924     | 0.938     | 1.074     | 0.900     | 1.051     | 0.929     | 1.004     | 0.876     | 0.996     | 1.353     | 1.118     | 4.816     | 1.019     | 0.987     | 0.917     | 0.883     | 1.007     |
| 25    | 1.546     | 1.209     | 1.058     | 0.972     | 1.076     | 0.983     | 1.098     | 1.019     | 1.200     | 1.639     | 1.039     | 1.414     | 1.070     | 1.010     | 0.986     | 1.340     | 12.370    | 2.619     | 123.495   | 2.248     | 0.946     | 0.998     | 1.030     | 1.058     |

TABLE S2

|             | 25μM      | 5μM       | 1μM   | 0.2μM |       | 25μM      | 5μM       | 1μM       | 0.2μM |       |       |       |
|-------------|-----------|-----------|-------|-------|-------|-----------|-----------|-----------|-------|-------|-------|-------|
| A           | D398-0063 | 1.506     | 1.018 | 0.977 | 1.040 | C         | F869-0056 | 29.471    | 1.842 | 1.066 | 1.010 |       |
|             | S646-0245 | 1.434     | 1.103 | 0.968 | 1.023 |           | F869-0035 | 9.423     | 1.164 | 1.101 | 1.065 |       |
|             | D398-0347 | 1.425     | 1.116 | 0.981 | 0.936 |           | F869-0673 | 7.280     | 0.716 | 0.647 | 0.766 |       |
|             | D398-0646 | 1.419     | 1.063 | 0.991 | 0.951 |           | F869-0698 | 7.244     | 0.916 | 1.159 | 0.999 |       |
|             | D398-0620 | 1.399     | 1.088 | 0.960 | 0.930 |           | F869-0659 | 6.529     | 0.917 | 0.899 | 0.956 |       |
|             | D398-1117 | 1.365     | 1.007 | 1.000 | 1.054 |           | F726-0656 | 2.939     | 0.854 | 1.125 | 1.077 |       |
|             | T829-1947 | 1.362     | 1.023 | 0.930 | 0.925 |           | F869-0031 | 2.526     | 0.978 | 1.074 | 0.921 |       |
|             | D398-0634 | 1.358     | 1.080 | 0.929 | 0.988 |           | F869-0647 | 2.342     | 0.805 | 0.809 | 0.892 |       |
|             | D398-0538 | 1.347     | 1.110 | 0.987 | 0.948 |           | F869-0666 | 2.052     | 0.900 | 0.944 | 0.854 |       |
|             | D398-0156 | 1.340     | 1.022 | 1.033 | 0.984 |           | F869-0367 | 1.943     | 0.800 | 0.923 | 0.950 |       |
|             | D398-0253 | 1.340     | 1.019 | 0.885 | 0.962 |           | F869-0348 | 1.895     | 0.951 | 1.012 | 0.903 |       |
|             | D398-0621 | 1.331     | 1.221 | 1.101 | 1.025 |           | F869-0686 | 1.745     | 0.813 | 0.997 | 0.932 |       |
|             | D398-0522 | 1.323     | 0.979 | 1.004 | 1.006 |           | F869-0694 | 1.627     | 0.764 | 0.833 | 0.850 |       |
|             | D398-0064 | 1.296     | 1.067 | 0.891 | 0.970 |           | F869-0716 | 1.570     | 0.781 | 0.854 | 0.932 |       |
|             | D398-0444 | 1.293     | 1.192 | 0.961 | 0.977 |           | F869-0682 | 1.496     | 0.876 | 0.836 | 0.995 |       |
|             | T829-1968 | 1.288     | 1.013 | 0.962 | 0.988 |           | F869-0036 | 1.475     | 0.800 | 0.951 | 1.013 |       |
|             | Y200-4546 | 1.287     | 1.076 | 0.955 | 1.030 |           | F869-0691 | 1.468     | 0.889 | 0.950 | 1.253 |       |
|             | D398-0618 | 1.282     | 1.018 | 0.993 | 1.007 |           | F869-0654 | 1.384     | 0.842 | 0.932 | 0.854 |       |
|             | D398-0539 | 1.267     | 1.048 | 1.029 | 0.987 |           | F869-0656 | 1.260     | 0.784 | 0.838 | 0.943 |       |
|             | S561-0501 | 1.262     | 0.985 | 0.937 | 0.971 |           | F869-1004 | 1.179     | 0.835 | 0.932 | 0.911 |       |
|             | D398-0061 | 1.260     | 1.059 | 0.999 | 1.015 |           | F869-0352 | 1.146     | 0.903 | 0.973 | 0.934 |       |
|             | SA44-0312 | 1.253     | 1.077 | 1.122 | 0.936 |           | F869-0723 | 1.141     | 0.757 | 0.892 | 0.938 |       |
|             | D398-0060 | 1.241     | 1.108 | 1.005 | 0.955 |           | F869-0641 | 1.141     | 0.972 | 0.921 | 0.946 |       |
|             | L239-0298 | 1.237     | 1.027 | 0.937 | 0.946 |           | F869-0086 | 1.138     | 0.929 | 0.926 | 0.944 |       |
|             | D398-0251 | 1.233     | 0.995 | 0.947 | 0.971 |           | F869-0660 | 1.137     | 0.875 | 0.881 | 0.949 |       |
|             | D398-0637 | 1.231     | 1.134 | 0.955 | 0.944 |           | F869-1003 | 1.067     | 0.853 | 0.882 | 0.961 |       |
|             | D398-0613 | 1.227     | 1.014 | 0.937 | 1.000 |           | F869-0662 | 1.057     | 0.824 | 0.866 | 0.899 |       |
|             | D398-0332 | 1.221     | 1.077 | 1.008 | 0.965 |           | F869-0679 | 1.048     | 0.906 | 0.879 | 0.900 |       |
|             | D398-0645 | 1.219     | 0.980 | 0.952 | 0.936 |           | F869-0667 | 1.036     | 0.810 | 0.803 | 1.084 |       |
|             | D398-0046 | 1.212     | 1.078 | 0.986 | 0.947 |           | F869-0710 | 1.030     | 0.763 | 0.909 | 0.879 |       |
|             | D398-0252 | 1.200     | 1.117 | 0.907 | 0.953 |           | F726-0667 | 1.023     | 1.116 | 1.057 | 1.066 |       |
|             | D398-0523 | 1.193     | 1.062 | 1.007 | 1.063 |           | F869-0669 | 1.020     | 0.823 | 0.856 | 0.914 |       |
|             | D398-0638 | 1.178     | 1.016 | 0.974 | 1.108 |           | F869-0042 | 1.013     | 0.922 | 1.018 | 1.070 |       |
|             | D398-0349 | 1.165     | 0.953 | 1.040 | 0.989 |           | F869-0061 | 1.010     | 0.965 | 0.962 | 1.007 |       |
|             | D398-1299 | 1.159     | 1.041 | 0.984 | 1.038 |           | F869-0350 | 1.001     | 0.932 | 0.988 | 0.963 |       |
|             | D398-0071 | 1.159     | 1.000 | 0.971 | 0.966 |           | F869-0068 | 0.989     | 0.944 | 1.007 | 0.973 |       |
|             | D398-0348 | 1.152     | 1.045 | 0.976 | 0.999 |           | F869-0693 | 0.973     | 0.852 | 0.896 | 0.960 |       |
|             | D398-0047 | 1.142     | 0.974 | 0.983 | 1.049 |           | F869-1009 | 0.965     | 0.839 | 1.056 | 0.908 |       |
|             | D398-0540 | 1.135     | 1.063 | 0.982 | 1.066 |           | F726-0654 | 0.964     | 0.896 | 1.082 | 0.917 |       |
|             | D398-0633 | 1.109     | 1.087 | 1.037 | 0.928 |           | F869-0093 | 0.921     | 0.833 | 0.960 | 0.998 |       |
|             | D398-0039 | 1.079     | 1.033 | 1.003 | 0.984 |           | F869-0981 | 0.906     | 0.860 | 0.863 | 0.869 |       |
|             | D398-0236 | 1.044     | 0.978 | 0.953 | 1.129 |           | F869-1294 | 0.901     | 0.854 | 0.958 | 0.982 |       |
|             | D398-0072 | 1.038     | 1.019 | 1.025 | 1.085 |           | F869-0019 | 0.900     | 0.962 | 1.138 | 0.962 |       |
|             | B         | SA59-0041 | 1.446 | 1.214 | 0.965 |           | 0.942     | F869-1290 | 0.899 | 0.970 | 0.958 | 0.883 |
|             |           | T622-0506 | 1.413 | 1.088 | 1.009 |           | 0.922     | F869-1303 | 0.896 | 0.730 | 0.833 | 0.887 |
| S672-0564   |           | 1.347     | 1.078 | 1.064 | 1.040 | F869-0718 | 0.887     | 0.761     | 0.942 | 0.906 |       |       |
| T622-0150   |           | 1.334     | 1.066 | 0.995 | 0.893 | F869-0005 | 0.886     | 0.934     | 0.999 | 1.040 |       |       |
| S223-0293   |           | 1.331     | 1.042 | 0.885 | 0.906 | F726-0685 | 0.872     | 0.926     | 1.041 | 0.983 |       |       |
| S232-0396   |           | 1.330     | 1.056 | 0.937 | 0.928 | F869-0950 | 0.867     | 0.982     | 0.971 | 0.913 |       |       |
| L629-0054   |           | 1.328     | 1.111 | 1.080 | 1.057 | F869-0658 | 0.862     | 0.779     | 0.785 | 0.887 |       |       |
| S329-4213   |           | 1.326     | 1.001 | 0.897 | 1.068 | F869-0370 | 0.861     | 0.842     | 0.906 | 0.908 |       |       |
| T622-0146   |           | 1.317     | 0.996 | 0.916 | 0.955 | F869-0344 | 0.835     | 0.778     | 0.876 | 1.005 |       |       |
| S635-3355   |           | 1.307     | 1.015 | 1.051 | 0.938 | F869-0349 | 0.833     | 0.962     | 0.980 | 1.005 |       |       |
| L629-0483   |           | 1.301     | 1.203 | 1.089 | 1.048 | F869-0357 | 0.816     | 0.935     | 0.983 | 0.952 |       |       |
| S213-0510   |           | 1.301     | 1.062 | 0.928 | 0.932 | F869-0049 | 0.808     | 0.904     | 1.020 | 0.976 |       |       |
| S511-0940   |           | 1.271     | 1.105 | 0.940 | 0.902 | F869-1292 | 0.804     | 0.992     | 1.018 | 1.017 |       |       |
| S910-0041   |           | 1.268     | 1.039 | 1.076 | 1.055 | F869-0041 | 0.796     | 0.916     | 1.023 | 0.960 |       |       |
| S635-4216   |           | 1.261     | 1.097 | 0.937 | 1.002 | F869-1284 | 0.796     | 0.936     | 0.878 | 0.901 |       |       |
| S511-1798   |           | 1.256     | 1.027 | 0.955 | 0.912 | F869-0360 | 0.782     | 0.875     | 0.927 | 0.900 |       |       |
| S511-1226   |           | 1.255     | 0.991 | 0.951 | 0.968 | F869-0032 | 0.775     | 0.943     | 1.082 | 0.989 |       |       |
| S649-1027   |           | 1.248     | 1.169 | 0.966 | 0.953 | F869-0632 | 0.773     | 0.927     | 0.949 | 0.987 |       |       |
| S662-0248   |           | 1.226     | 1.103 | 0.979 | 1.017 | F869-0997 | 0.757     | 0.887     | 1.004 | 0.884 |       |       |
| T622-0510   |           | 1.212     | 1.018 | 0.992 | 0.930 | F869-0063 | 0.750     | 0.892     | 1.019 | 0.993 |       |       |
| S635-3812   |           | 1.202     | 1.093 | 1.023 | 1.110 | F869-0671 | 0.746     | 0.692     | 0.851 | 0.966 |       |       |
| CM4575-1890 |           | 1.196     | 1.032 | 0.911 | 0.952 | F869-0067 | 0.731     | 0.872     | 1.022 | 0.929 |       |       |
| S511-1512   |           | 1.161     | 1.010 | 0.942 | 0.982 | F869-0084 | 0.727     | 0.777     | 0.995 | 0.955 |       |       |
| S726-0860   |           | 1.157     | 1.031 | 0.961 | 0.913 | F869-0697 | 0.718     | 0.801     | 0.782 | 0.848 |       |       |
| S890-0049   |           | 1.150     | 1.016 | 0.917 | 1.053 | F869-0649 | 0.710     | 0.911     | 1.011 | 0.907 |       |       |
| S511-2084   |           | 1.146     | 1.072 | 0.927 | 0.940 | F869-0064 | 0.697     | 0.835     | 0.930 | 0.898 |       |       |
| T500-1525   |           | 1.131     | 1.042 | 0.956 | 0.965 | F869-0024 | 0.684     | 0.771     | 0.968 | 1.028 |       |       |
| S997-1225   |           | 1.114     | 0.963 | 0.888 | 0.956 | F869-0039 | 0.669     | 0.895     | 0.992 | 0.925 |       |       |
| M574-0652   |           | 1.103     | 1.004 | 1.004 | 0.971 | F869-0644 | 0.664     | 0.871     | 0.929 | 1.002 |       |       |
| S330-4119   |           | 1.094     | 1.073 | 0.967 | 1.031 | F869-0070 | 0.658     | 0.892     | 0.944 | 0.936 |       |       |
| S726-1438   |           | 1.046     | 1.090 | 0.895 | 0.964 | F869-0724 | 0.643     | 0.792     | 0.894 | 0.984 |       |       |
|             |           |           |       |       |       | F869-0661 | 0.612     | 0.998     | 0.892 | 0.894 |       |       |
|             |           |           |       |       |       | F869-0037 | 0.608     | 0.862     | 1.015 | 0.974 |       |       |
|             |           |           |       |       |       | F869-0726 | 0.587     | 0.835     | 0.828 | 0.905 |       |       |
|             |           |           |       |       |       | F869-0054 | 0.587     | 0.850     | 1.015 | 0.942 |       |       |
|             |           |           |       |       |       | F869-0714 | 0.584     | 0.755     | 0.787 | 0.967 |       |       |
|             |           |           |       |       |       | F869-0681 | 0.575     | 0.812     | 0.954 | 0.943 |       |       |
|             |           |           |       |       |       | F869-0692 | 0.572     | 0.779     | 0.774 | 0.836 |       |       |
|             |           |           |       |       |       | F869-0051 | 0.523     | 0.841     | 0.936 | 0.980 |       |       |

TABLE S3

| Gene   | Fold | Gene   | Fold | Gene  | Fold | Gene    | Fold |
|--------|------|--------|------|-------|------|---------|------|
| UBC    | 53.8 | PSMD14 | 16.0 | PSMA5 | 8.4  | CHD3    | 5.1  |
| UBB    | 39.9 | PSMD12 | 14.8 | PSMA1 | 8.1  | DCAF1   | 4.4  |
| PSMA4  | 31.3 | PSMD7  | 14.5 | PSMA7 | 6.5  | OTUD3   | 4.3  |
| PSMA3  | 30.5 | PSMB7  | 13.7 | PSMC5 | 6.3  | PCGF2   | 4.2  |
| PSMA6  | 29.5 | PSMB6  | 12.9 | PSMC6 | 6.2  | CHFR    | 4.1  |
| PSMD8  | 26.7 | PSMB4  | 12.5 | PSMD2 | 5.8  | MARCH11 | 4.1  |
| PSMD1  | 25.2 | PSMB1  | 12.3 | JOSD1 | 5.7  | KLHL6   | 4.0  |
| PSMD11 | 23.5 | PSMB5  | 11.7 | BTBD8 | 5.6  | PSMC4   | 4.0  |
| PSMD6  | 20.4 | POMP   | 11.2 | PSMA2 | 5.5  | RPP21   | 3.9  |
| PSMB3  | 18.2 | PSMD3  | 8.8  | COPS2 | 5.1  | HERC4   | 3.9  |
